# Supplementary material
Source: PubMed Central journal article supplement (PMC4291495)
Supplement: cdd2014157x1.pdf [file cdd2014157x1.pdf]

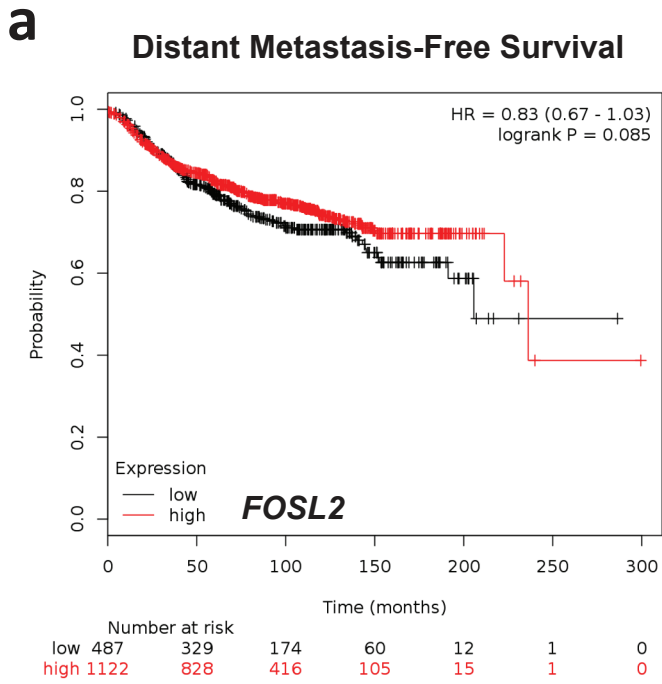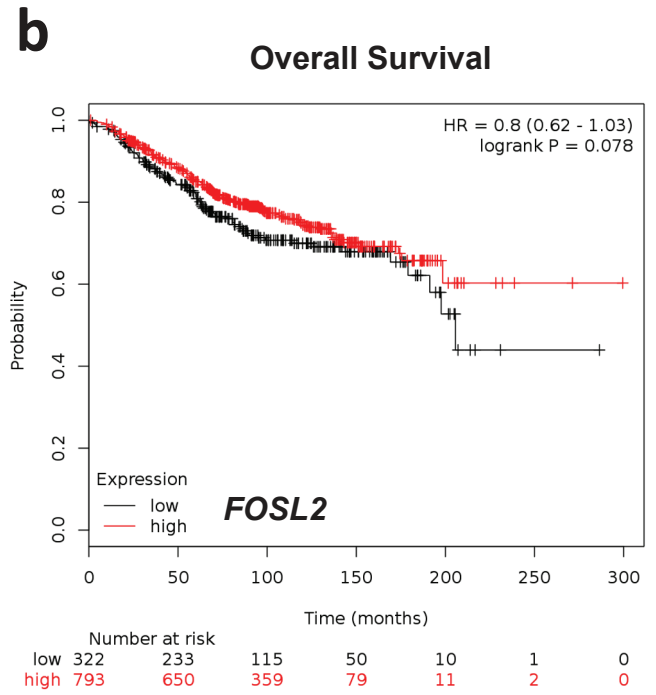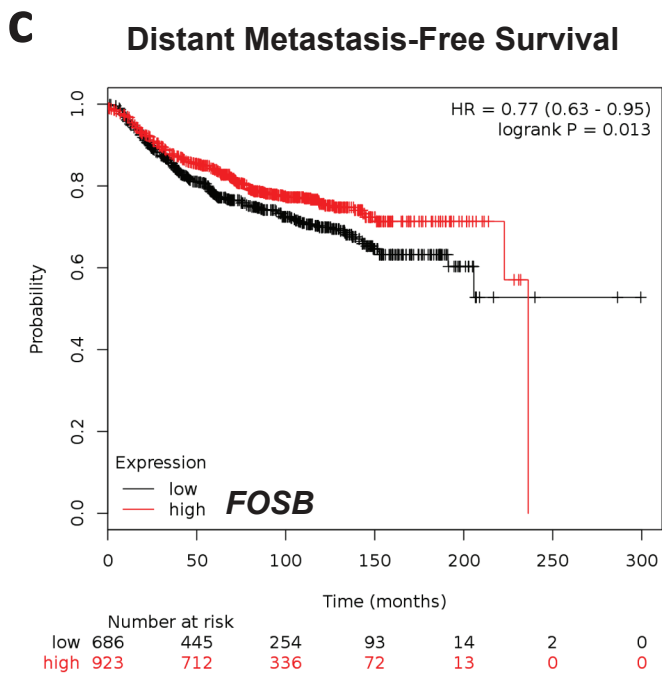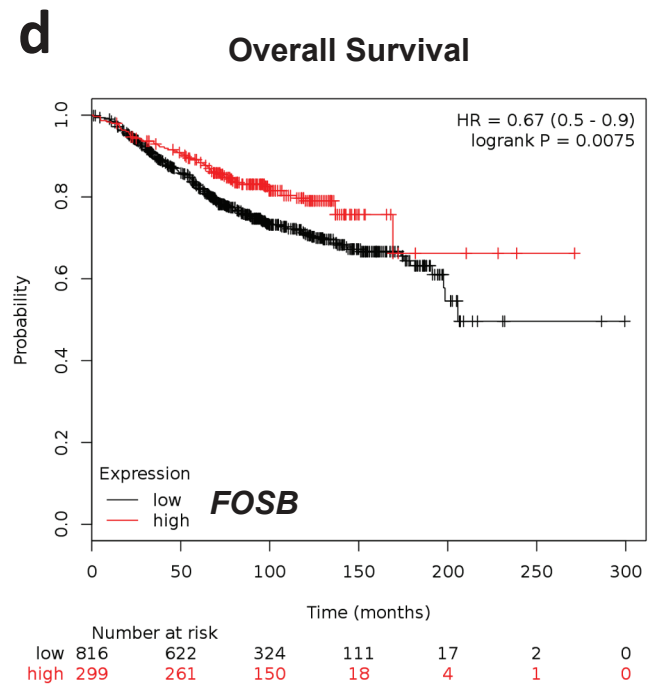

Sup Figure 1

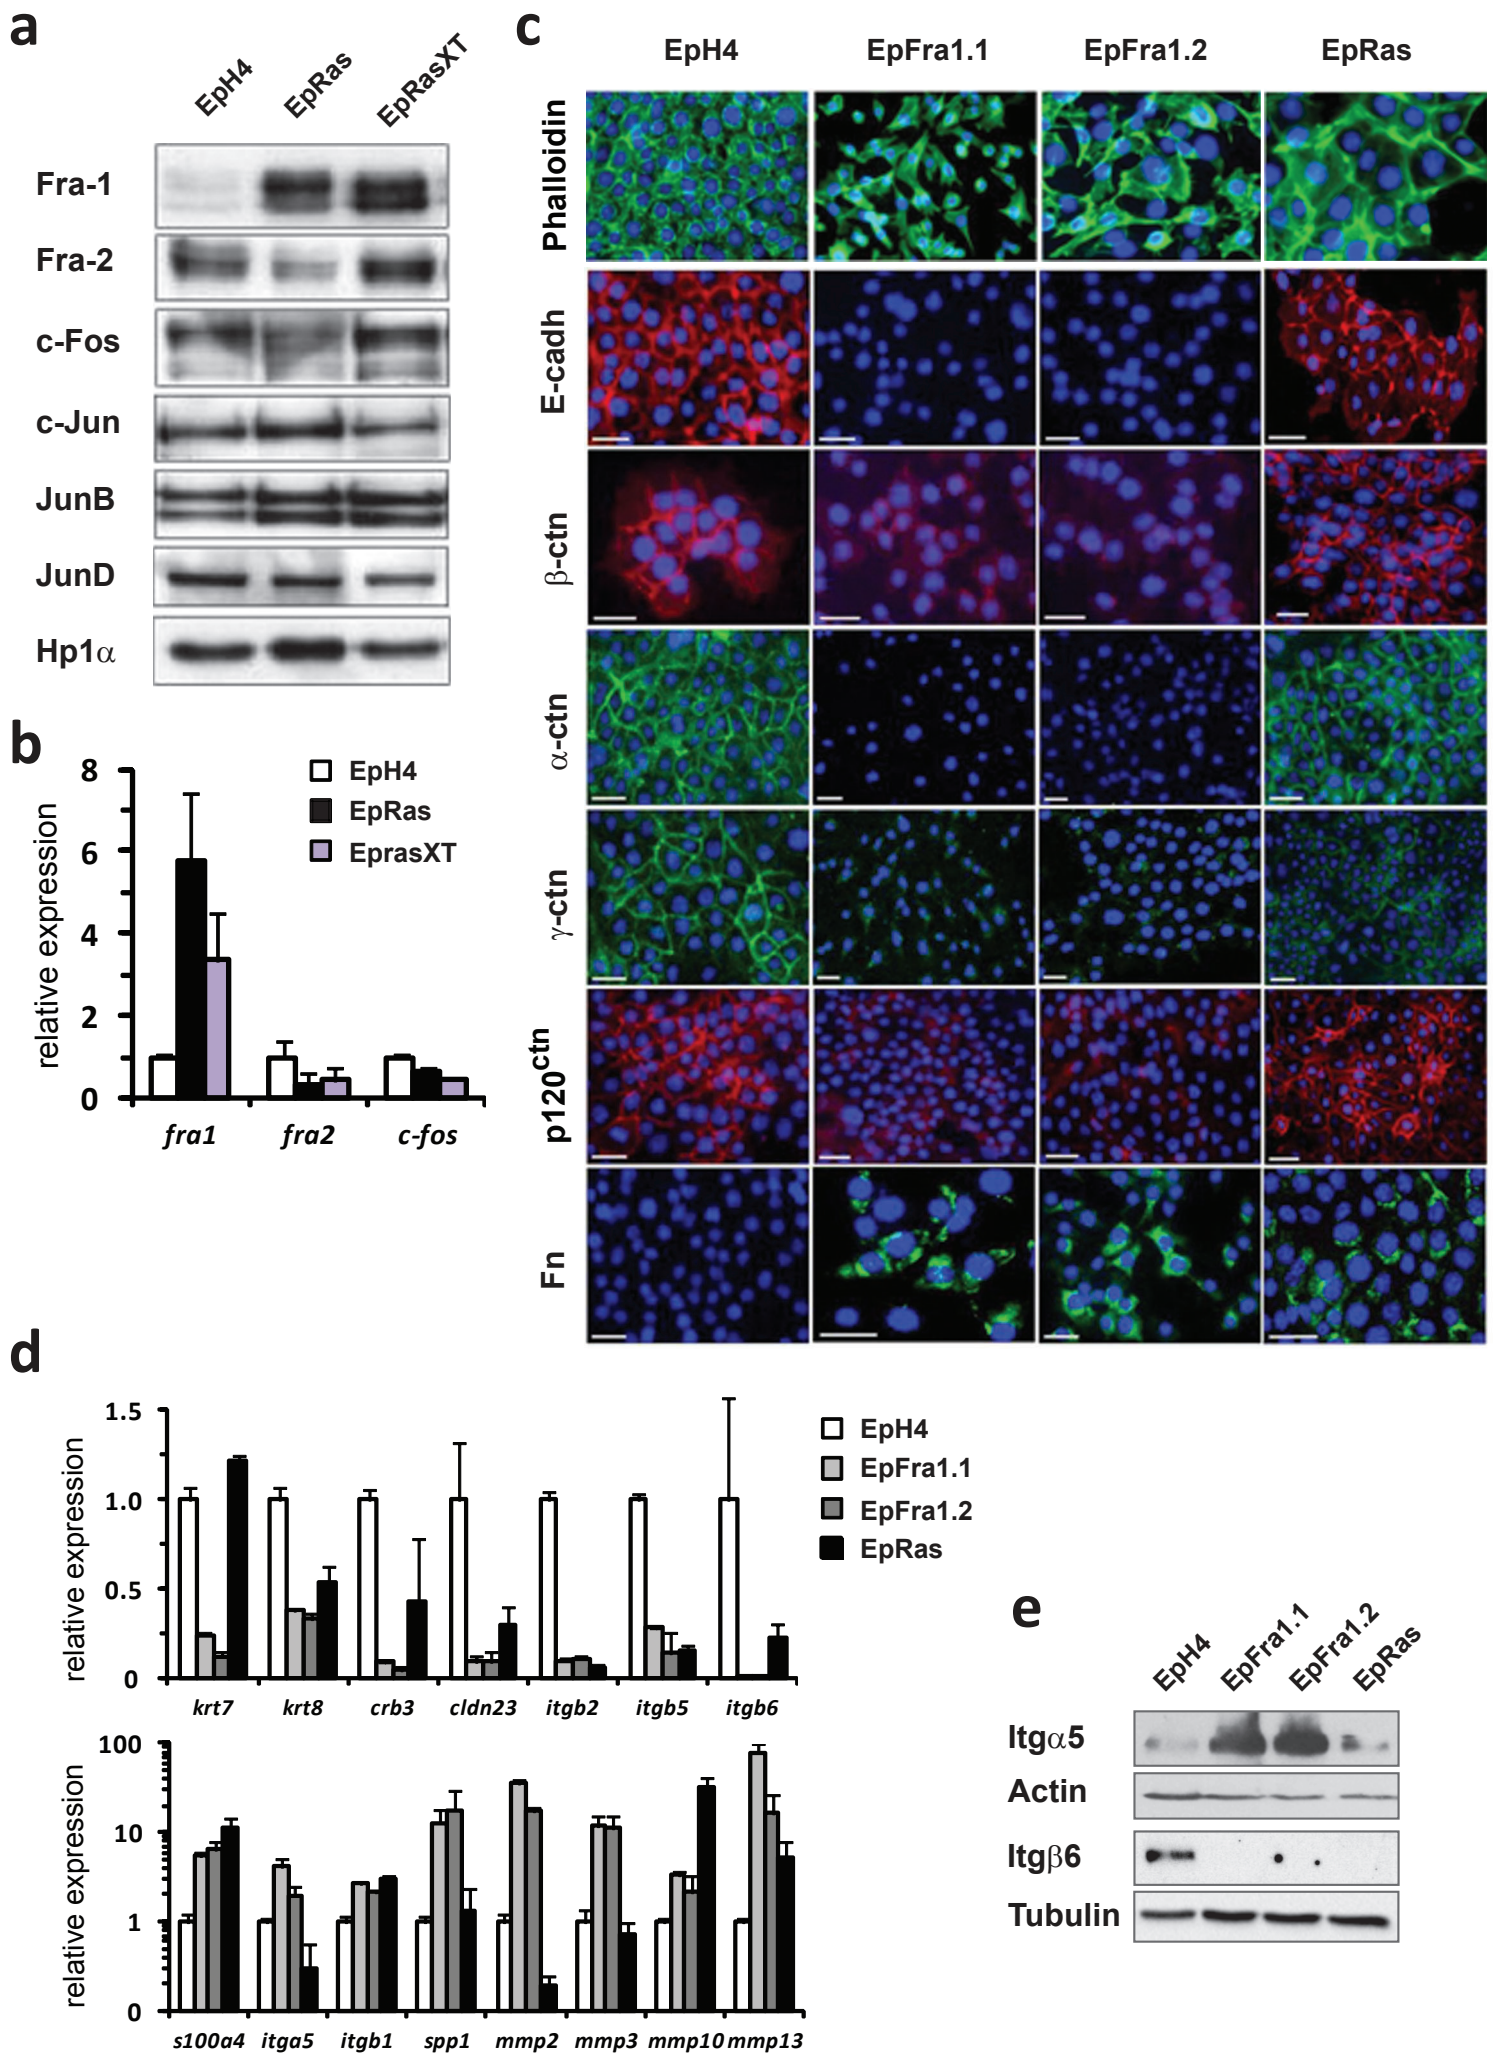

Sup Figure 2

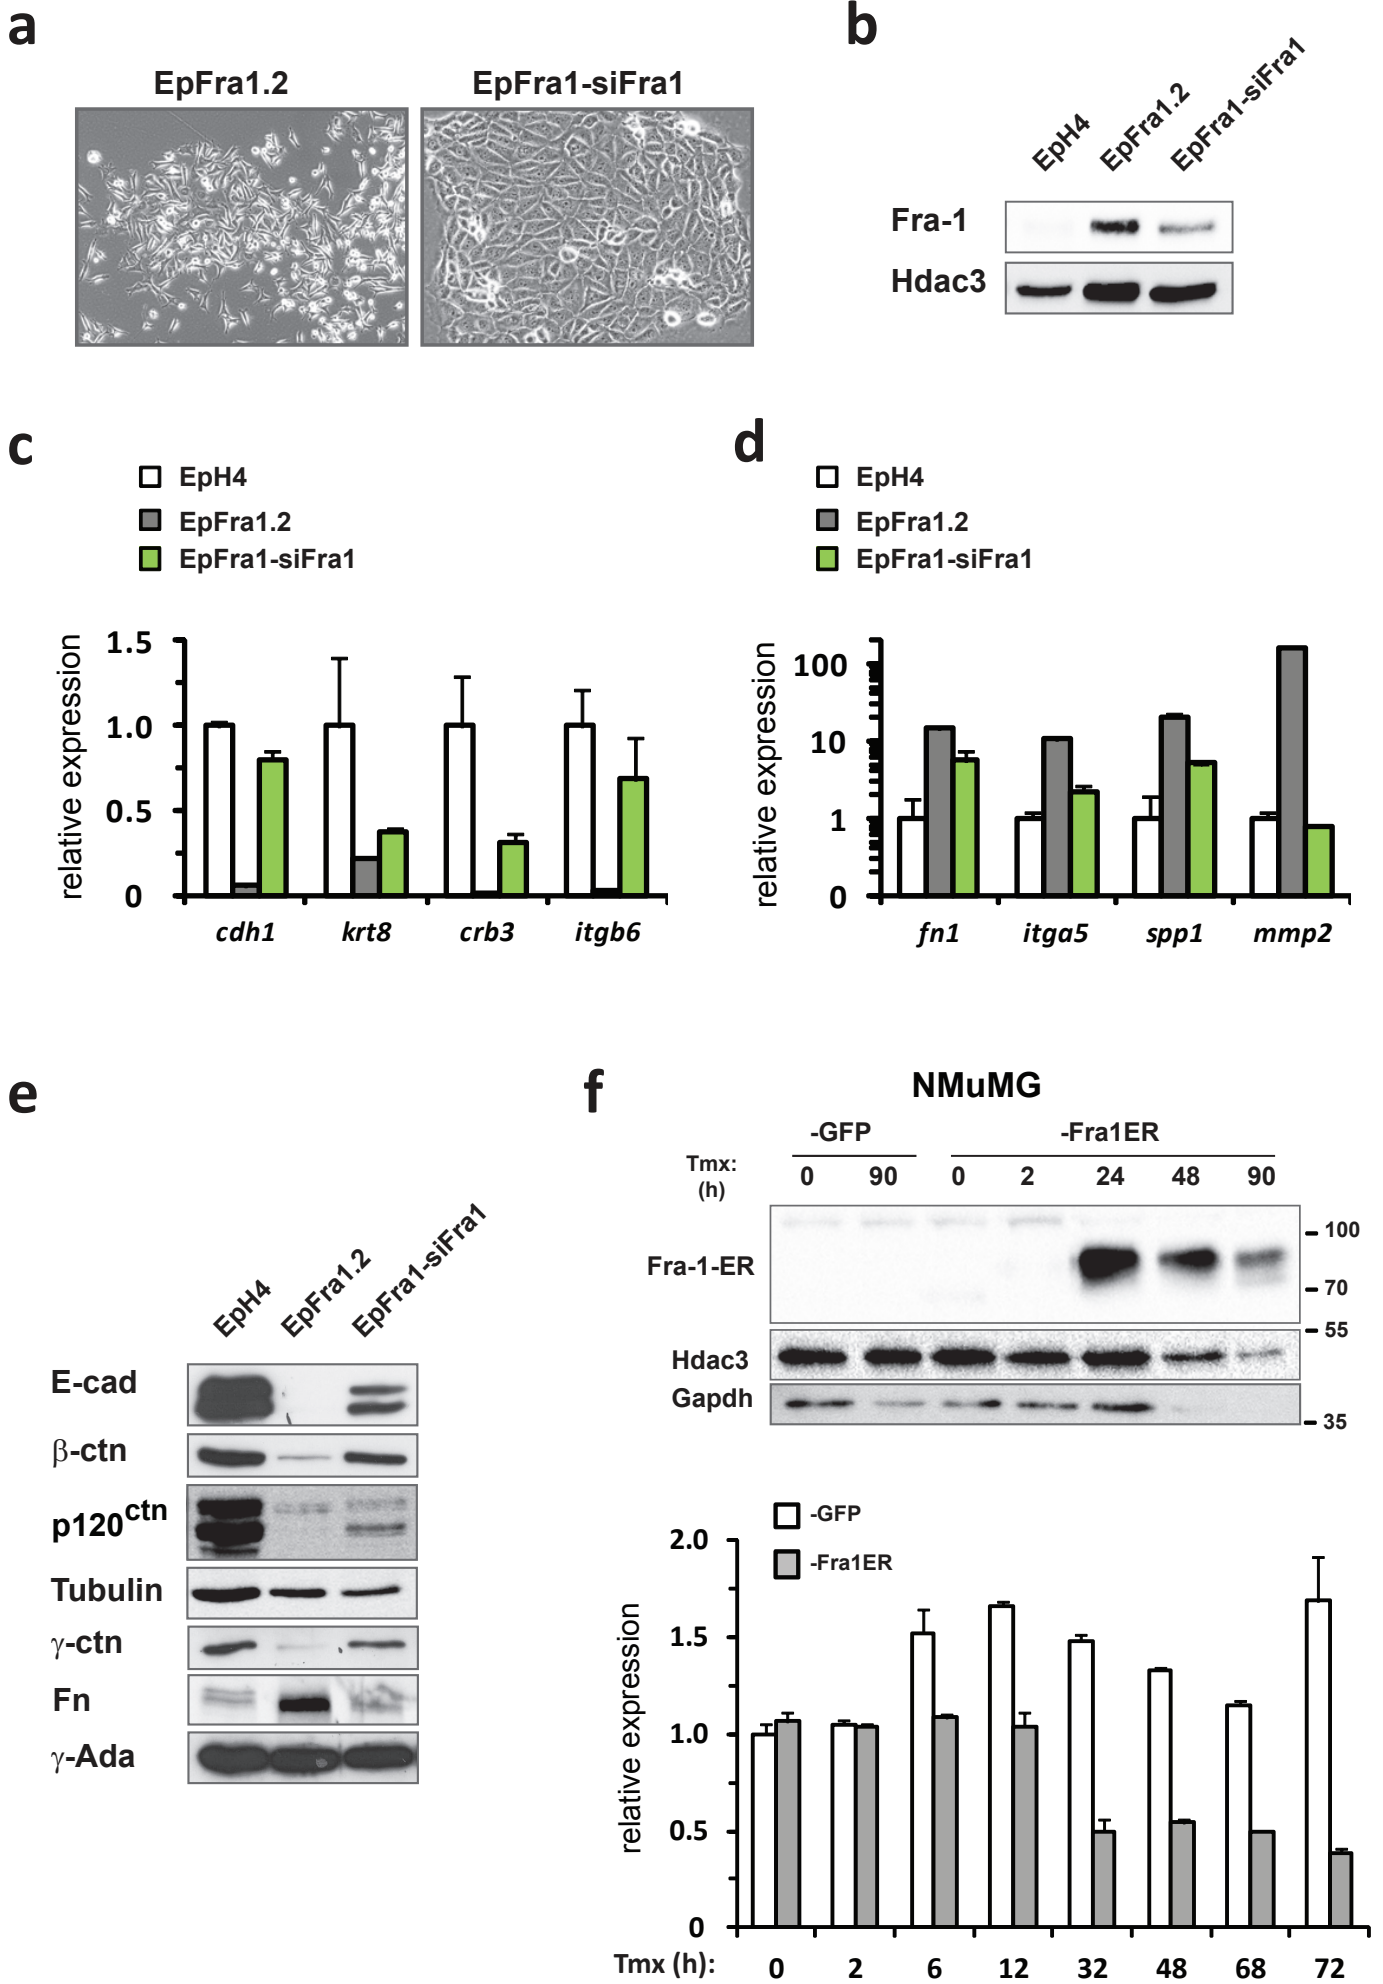

Sup Figure 3

**a**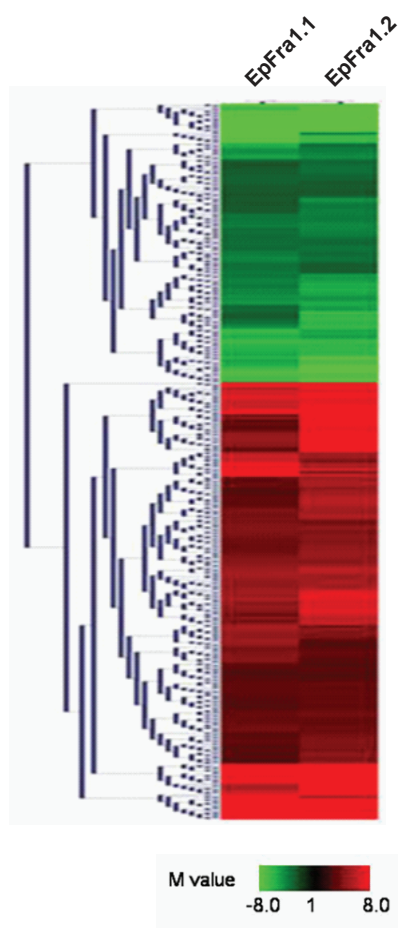**b**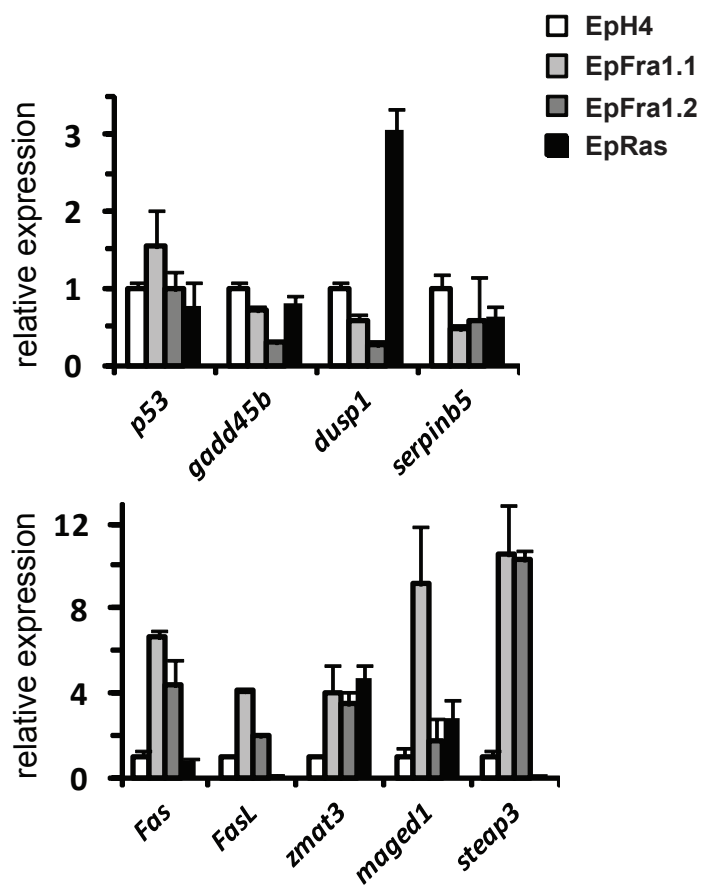

Sup Figure 4

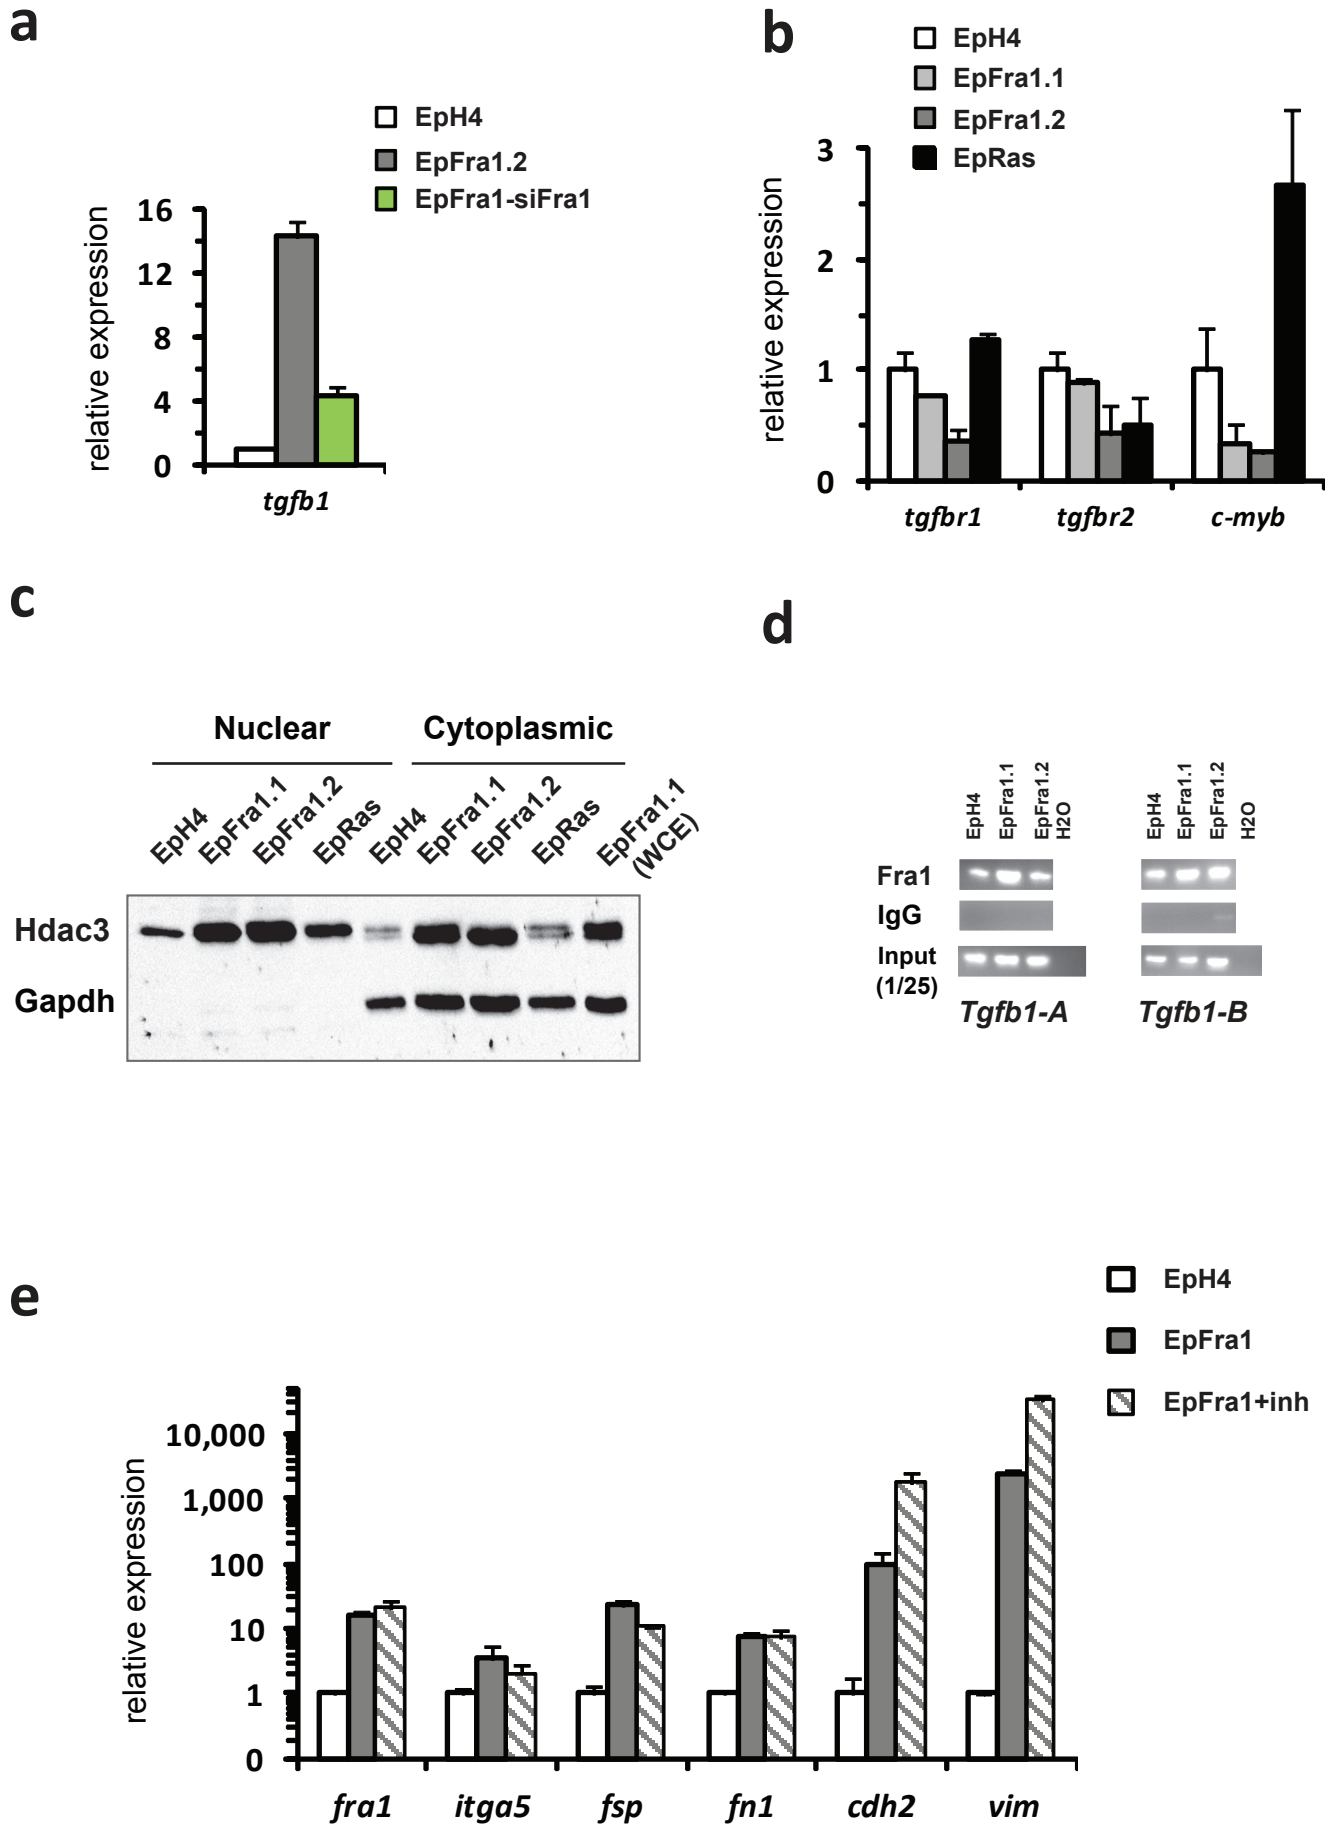

Sup Figure 5

**a**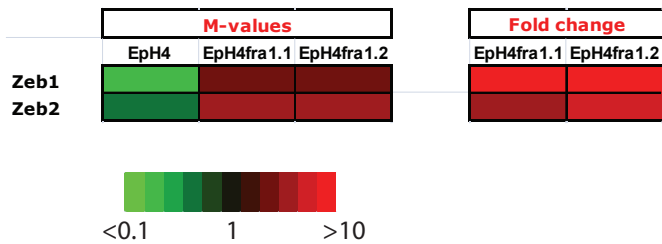**b**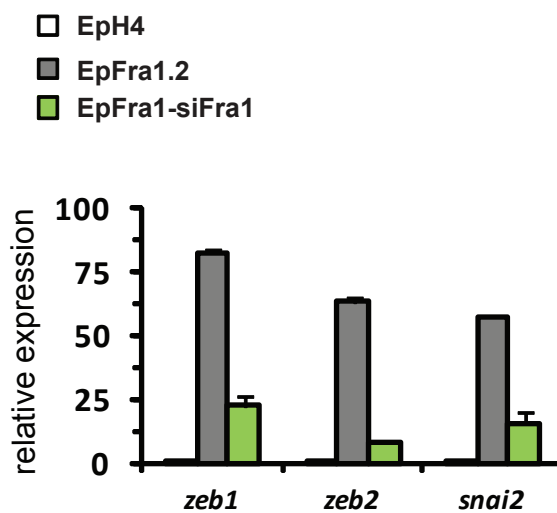**c**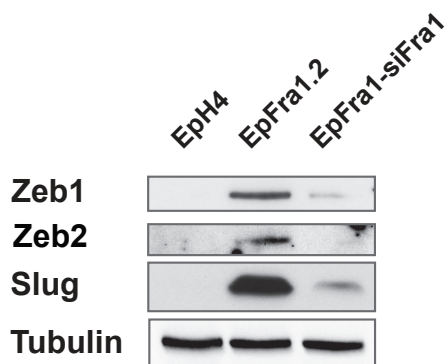**d**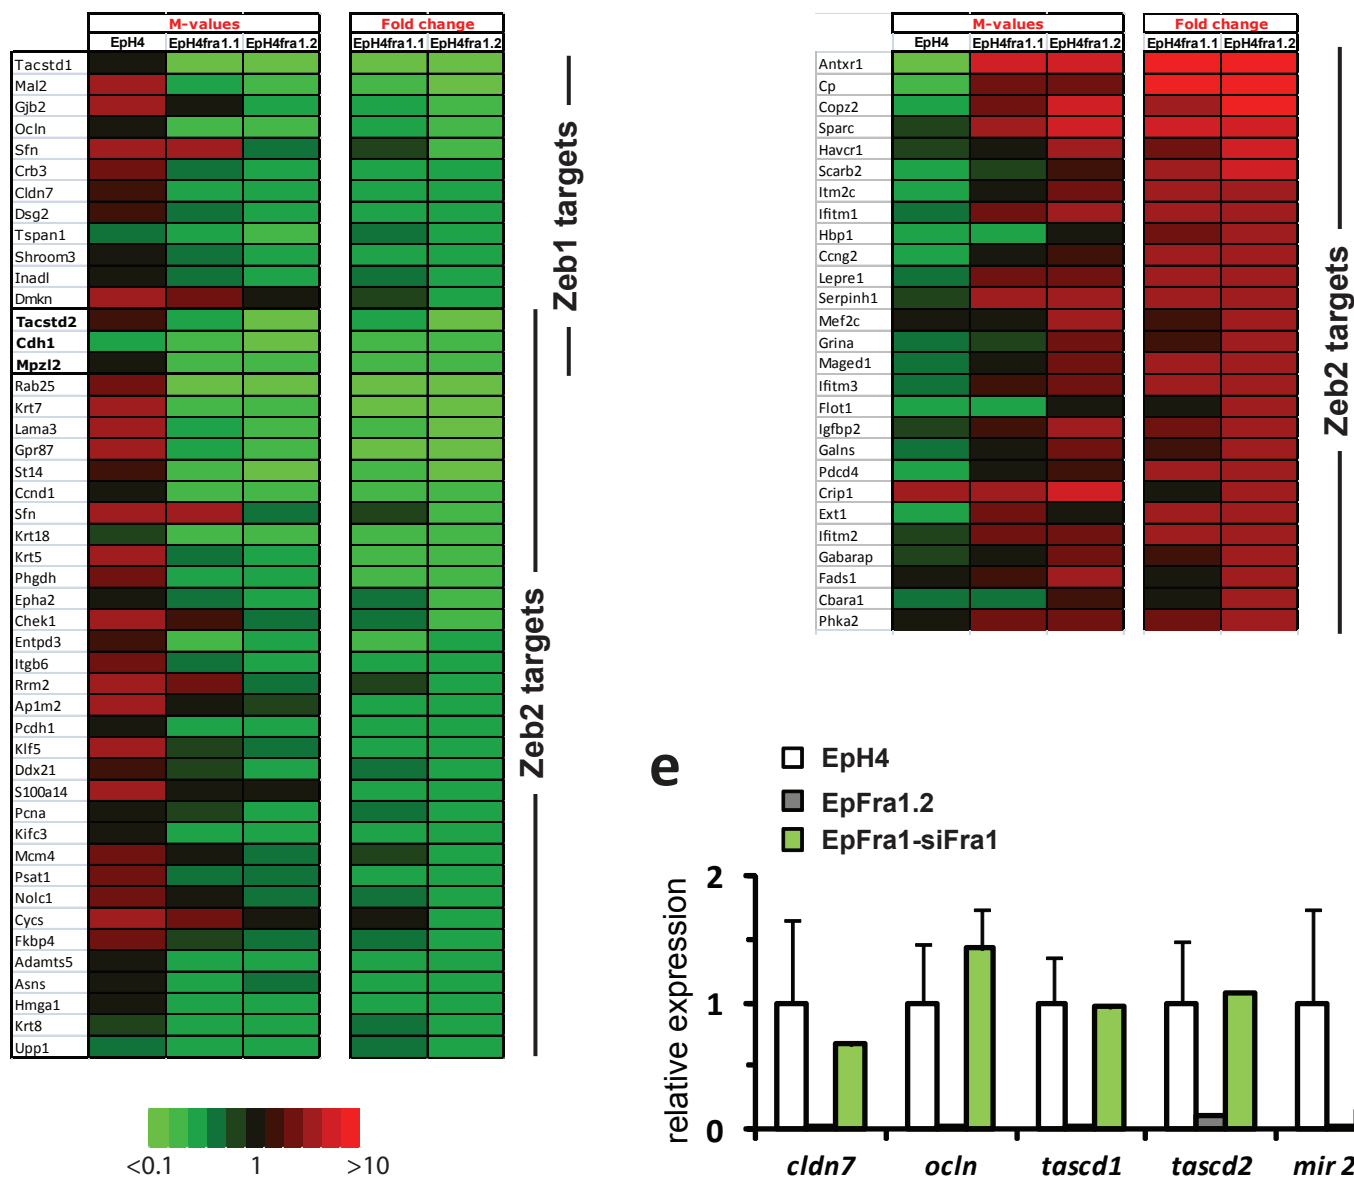

Sup Figure 6

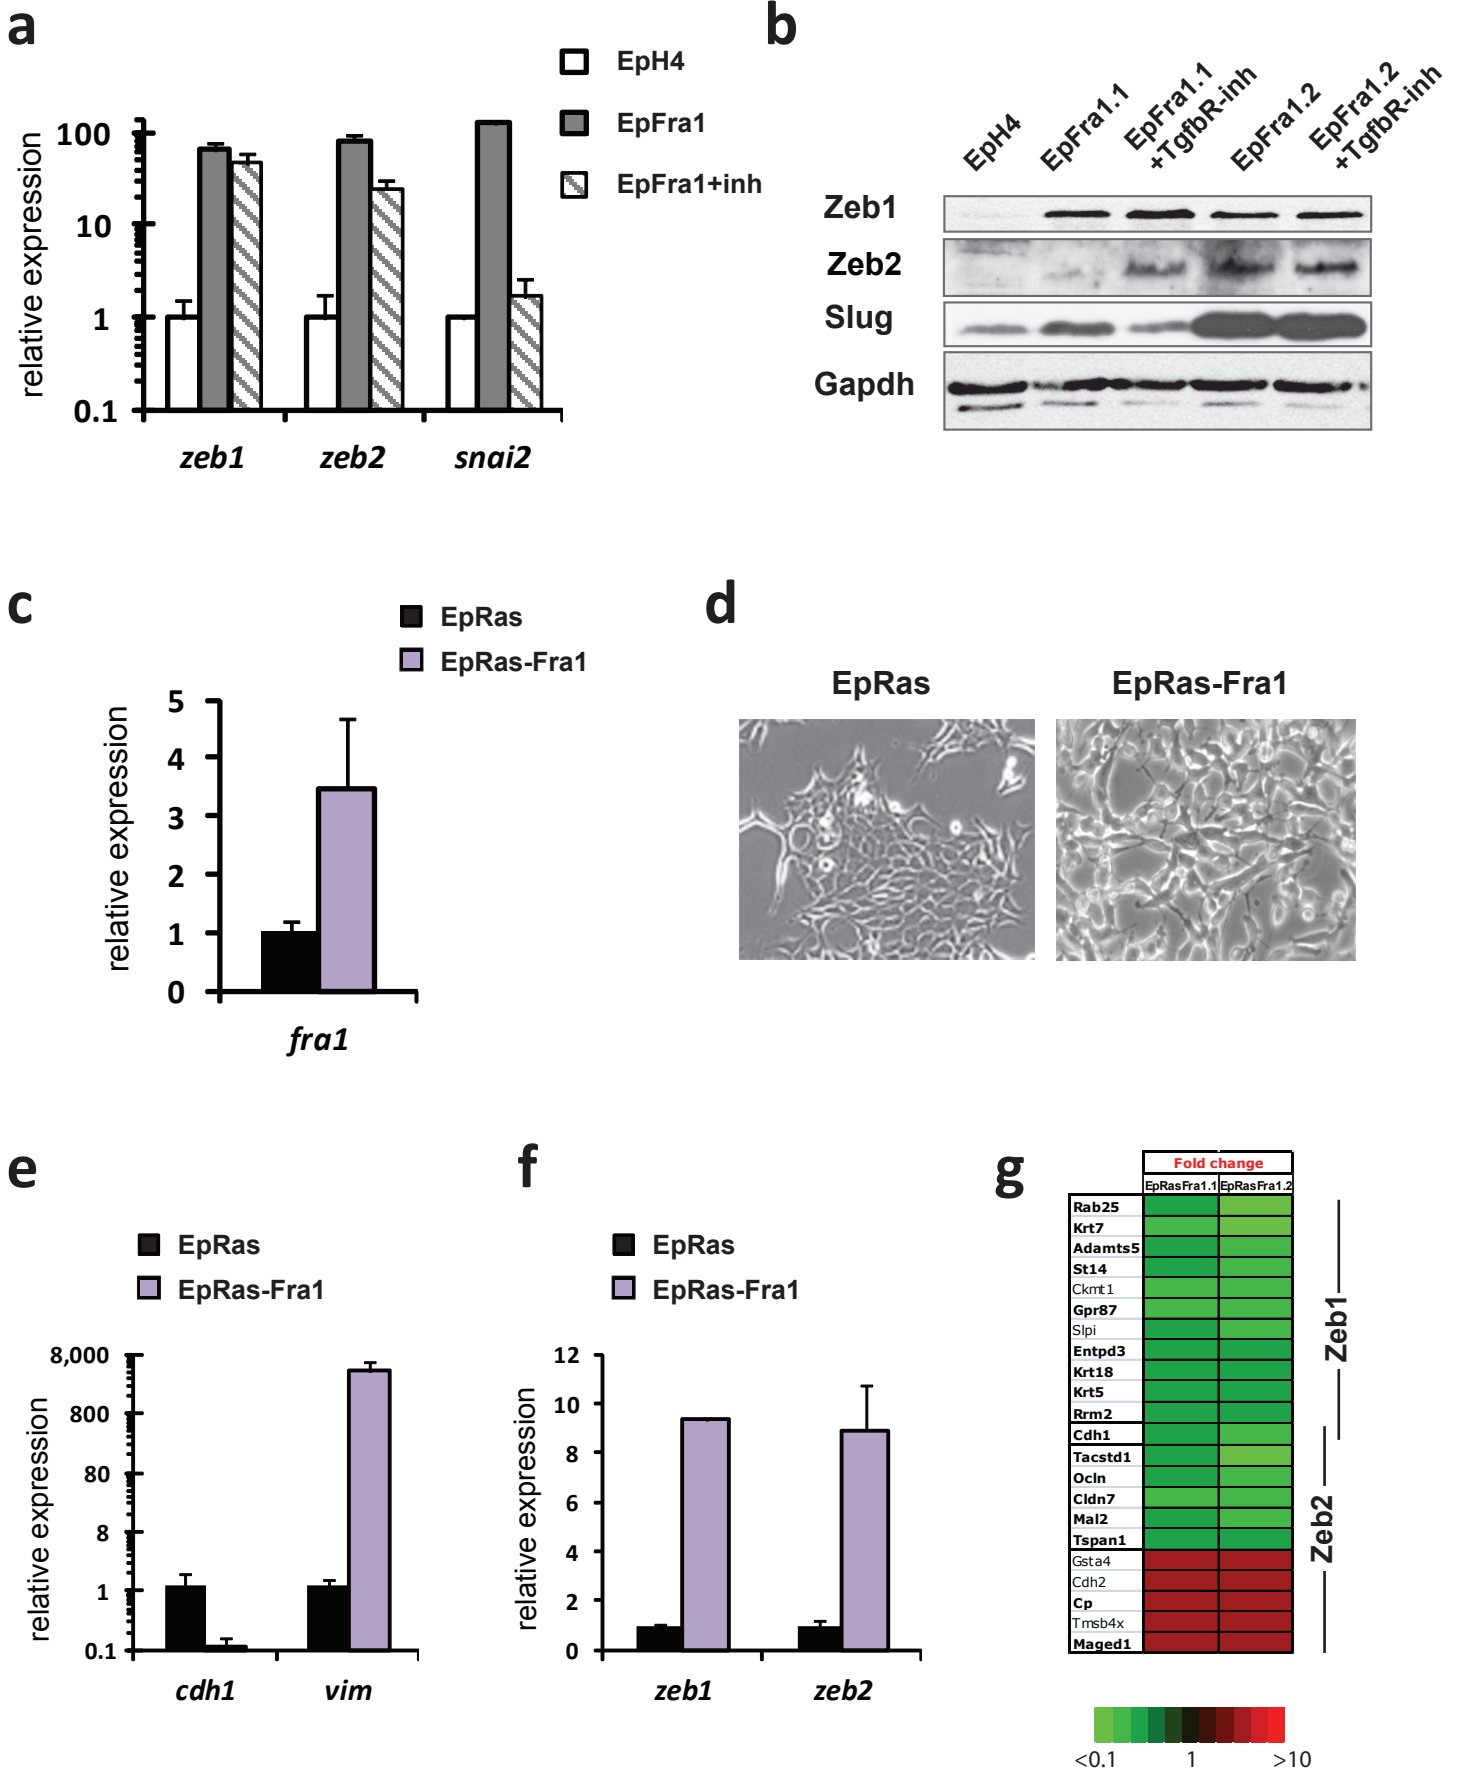

Sup Figure 7

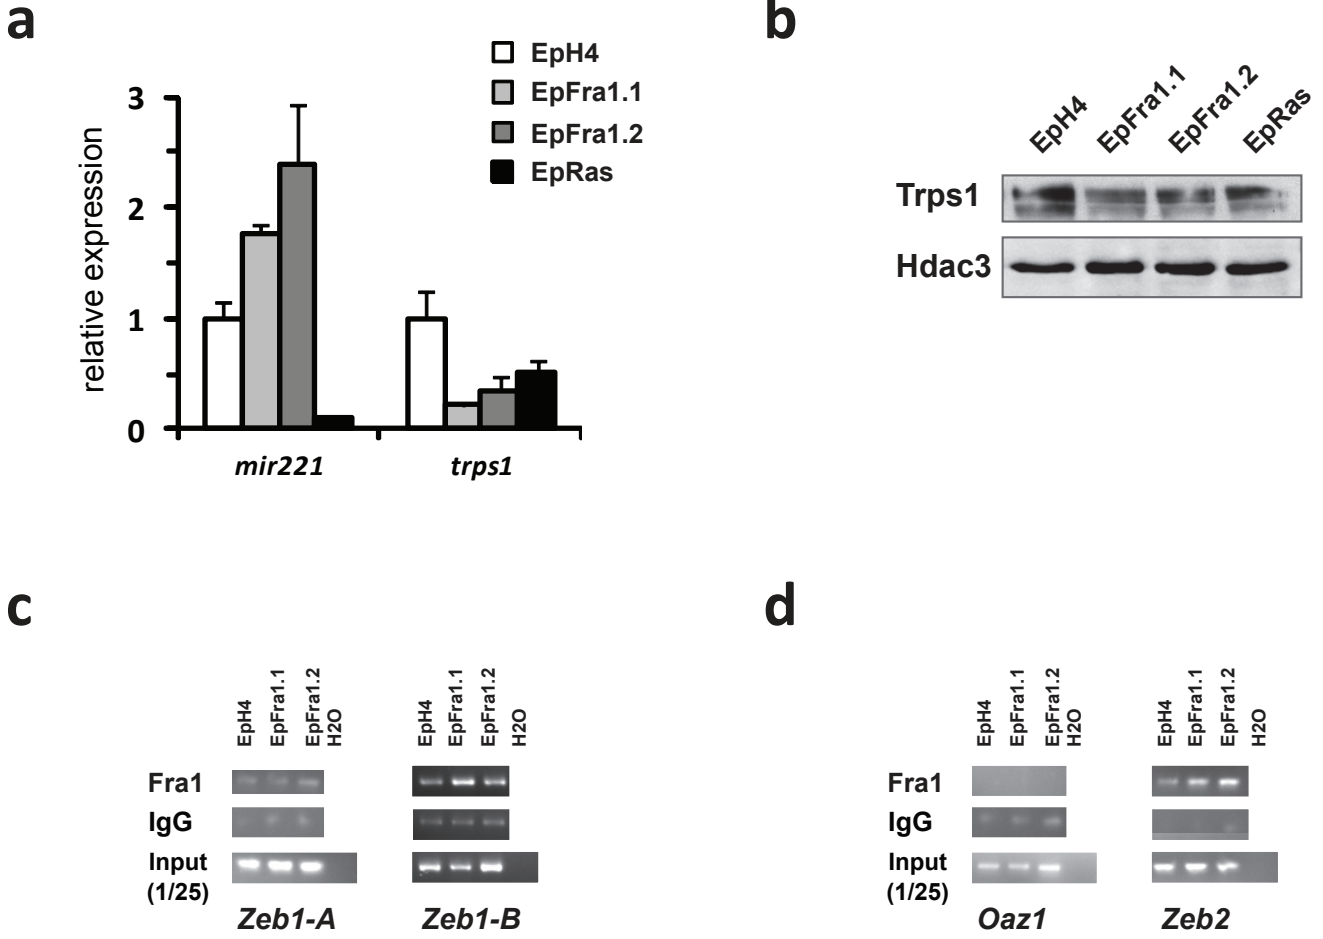

Sup Figure 8



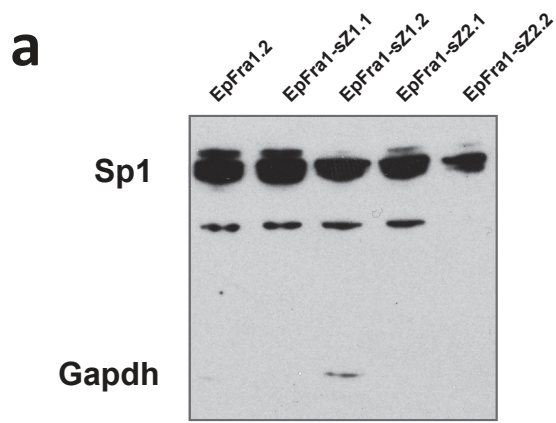

**b**

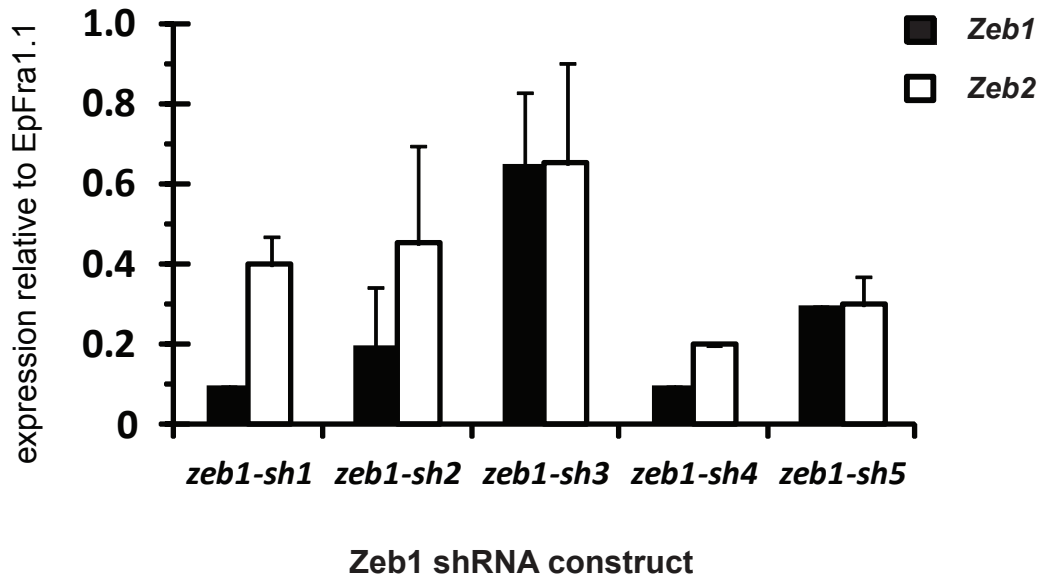

**c**

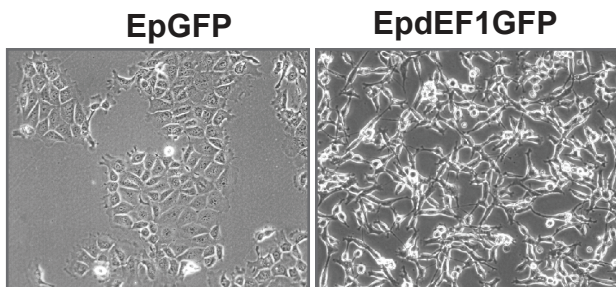

**d**

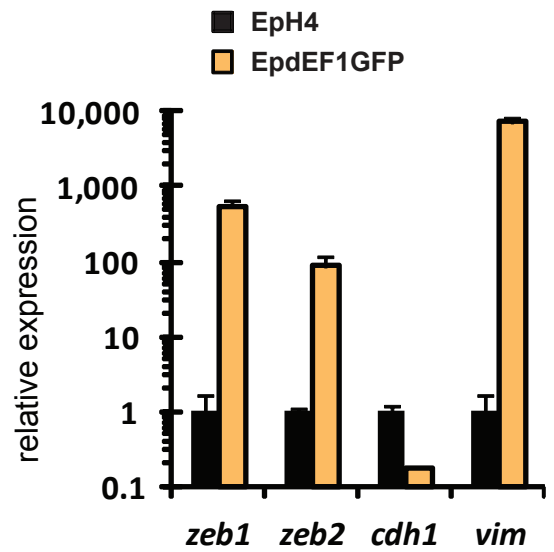

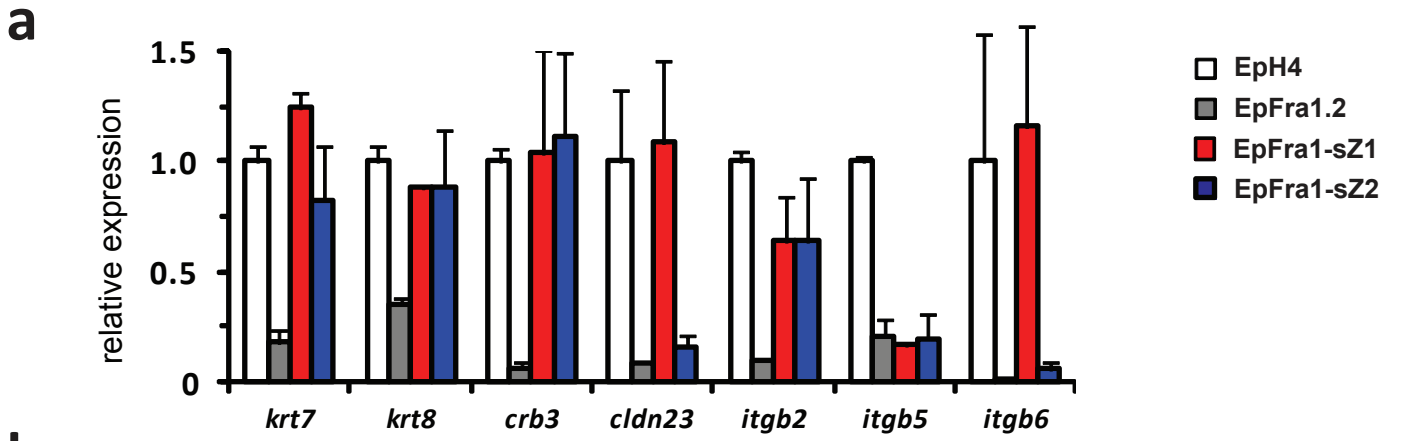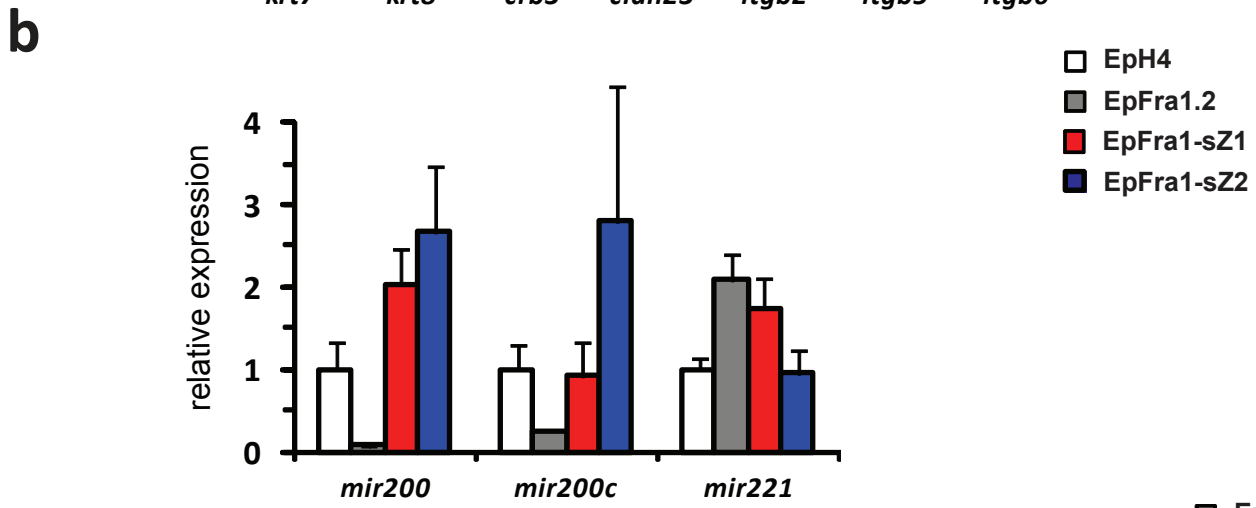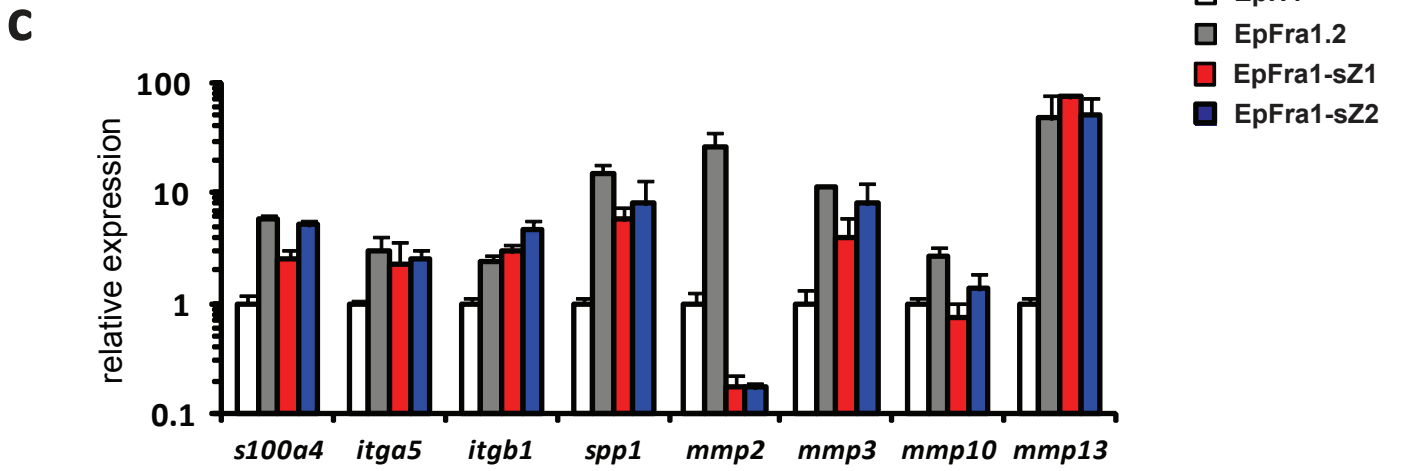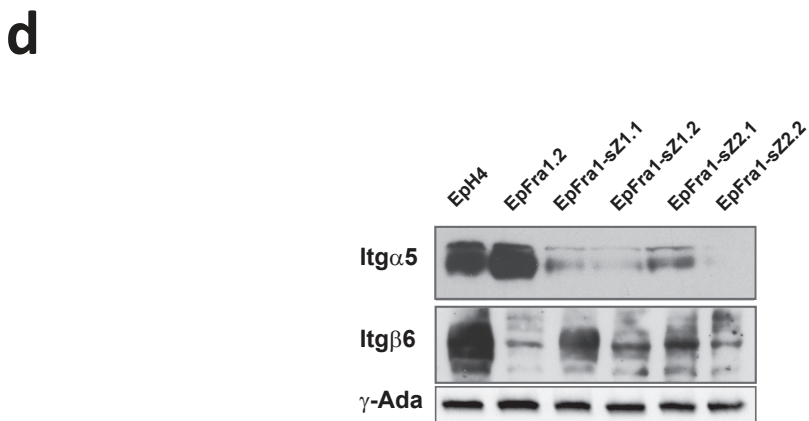

Sup Figure 10

TF motifs: Genes with promoter regions [-2kb,2kb] around transcription start site containing the motif:

## Up regulated set

# genes in comparison (n): 381

| Motif           | Description                      | p value              | annotated TF:    |
|-----------------|----------------------------------|----------------------|------------------|
| <b>CArG box</b> | ATGCC <b>CCATATATGG</b> WNNT     | 6.57 e <sup>-4</sup> | <b>SRF</b>       |
| <b>CArG box</b> | D <b>CCWTATATGG</b> NCWN         | 1.67 e <sup>-3</sup> | <b>SRF</b>       |
|                 | NKNTTGCNYAAYNN                   | 1.91 e <sup>-3</sup> | <b>C/EBPbeta</b> |
|                 | NNAACATCTGGA                     | 3.7 e <sup>-3</sup>  | <b>ZNF238</b>    |
|                 | NNNNNNC <sup>3</sup> NTNTGTNCTNN | 3.38 e <sup>-3</sup> | <b>GR</b>        |
|                 | NCTATAAAAR                       | 1.09 e <sup>-2</sup> | TAF<br> TATA     |
|                 | NNANNG <b>TAAACA</b> NNN         | 1.14 e <sup>-2</sup> | <b>FOXF2</b>     |
| <b>CArG box</b> | <b>CCAWATAWGG</b> MNMNG          | 1.48 e <sup>-2</sup> | <b>SRF</b>       |
|                 | GRGAAAMBBWCAGS                   | 1.48 e <sup>-2</sup> | <b>PTF1A</b>     |
| <b>CArG box</b> | <b>SCCAWATAWGG</b> MNMNNNN       | 1.53 e <sup>-2</sup> | <b>SRF</b>       |
|                 | RTAAACA                          | 1.61 e <sup>-2</sup> | <b>FOXF2</b>     |
|                 | GGGAGGRR                         | 1.84 e <sup>-2</sup> | <b>MAZ</b>       |
| <b>CRE</b>      | V <b>GTGACGTMACN</b>             | 2.03 e <sup>-2</sup> | <b>ATF-2</b>     |

## Down regulated set

# genes in comparison (n): 246

| Motif             | Description              | p value              | annotated TF: |
|-------------------|--------------------------|----------------------|---------------|
| <b>E-box</b>      | VSNG <b>CAGGTG</b> KNCNN | 3.68 e <sup>-3</sup> | <b>TCF3</b>   |
| <b>TRE</b>        | <b>TGANTCA</b>           | 5.27 e <sup>-3</sup> | <b>JUN</b>    |
| <b>TRE</b>        | <b>TGACTC</b> ANN SKN    | 7.08 e <sup>-3</sup> | <b>JUN</b>    |
| <b>E-box</b>      | <b>CAGGTG</b>            | 1.02 e <sup>-2</sup> | <b>TCF3</b>   |
| <b>TRE</b>        | <b>TGAGTCAN</b>          | 1.24 e <sup>-2</sup> | <b>JUN</b>    |
| <b>TRE</b>        | NN <b>NTGAGTCA</b> KCN   | 1.45 e <sup>-2</sup> | <b>JUN</b>    |
| <b>E-box</b>      | WNW <b>CACCTG</b> WNN    | 2.54 e <sup>-2</sup> | <b>TCF8</b>   |
| <b>CRE</b>        | V <b>GTGACGTMACN</b>     | 2.54 e <sup>-2</sup> | <b>ATF-2</b>  |
| <b>MYOG/E-box</b> | RG <b>CAGSTG</b>         | 2.60 e <sup>-2</sup> |               |
| <b>TRE</b>        | NN <b>TGACTC</b> ANN     | 2.86 e <sup>-2</sup> | <b>JUN</b>    |
| <b>E-box</b>      | RR <b>CAGGTG</b> NCV     | 3.06 e <sup>-2</sup> | <b>TCF3</b>   |
| <b>E-box</b>      | NNYNY <b>ACCTG</b> WVT   | 3.72 e <sup>-2</sup> | <b>TCF8</b>   |
| <b>TRE</b>        | S <b>RTGAGTCAN</b> C     | 3.72 e <sup>-2</sup> |               |

Sup Table 1

## Antibodies

| antigen     | supplier             | cat#       |
|-------------|----------------------|------------|
| a-Catenin   | BD Transduction Labs | 610193     |
| Actin       | Sigma                | A 2066     |
| b-Catenin   | BD Transduction Labs | 610154     |
| c-Jun       | Santa Cruz           | sc-44      |
| c-Myb       | Millipore            | 05-175     |
| E-Cadherin  | BD Transduction Labs | 610404     |
| E-Cadherin  | R&D                  | AF748      |
| Fibronectin | Sigma                | F3648      |
| Fra-1       | Santa Cruz           | sc-183     |
| Fra-2       | Santa Cruz           | sc-171     |
| g-Adaptin   | BD Transduction Labs | 610385     |
| Gapdh       | Sigma                | G8795      |
| g-catenin   | BD Transduction Labs | 610253     |
| Hdac3       | Santa Cruz           | sc-11417   |
| HP1 a       | Euromedex            | 2HP-2G9-AS |
| Integrin a5 | Santa Cruz           | sc-10729   |
| Integrin b6 | R&D                  | AF2389     |
| JunB        | Santa Cruz           | sc-73      |
| JunD        | Santa Cruz           | sc-74      |
| Ki67        | DAKO                 | M7249      |
| p120ctn     | BD Transduction Labs | 612536     |
| rabbit IgG  | Abcam                | ab46540    |
| Slug        | Cell Signaling       | 9585       |
| SP1         | Santa Cruz           | sc-059     |
| Trps1       | Abcam                | ab125197   |
| Tubulin     | Sigma                | T 9026     |
| Vimentin    | Cell Signaling       | 3932       |
| Zeb1        | Sigma                | SAB3500514 |
| Zeb2        | Santa Cruz           | sc-48789   |

## shRNA (pLKO.1 MISSION™, Sigma)

| target  | clones:                   | cat#               |
|---------|---------------------------|--------------------|
| Fra-1   | TRCN0000042683 to 42687   | SHCLND-NM_010235   |
| Zeb1    | TRCN00000235850 to 235854 | SHCLNV-NM_011546.2 |
| Zeb2    | TRCN00000070883 to 70887  | SHCLNV-NM_015753   |
| Control | nontarget                 | SHC002             |

**Sup Table 2**

| gene           | forward primer         | reverse primer         | application/notes                |
|----------------|------------------------|------------------------|----------------------------------|
| <i>cdh1</i>    | AGCCATTGCCAAGTACATCC   | AAAGACCGGCTGGGTAAACT   | qRT-PCR                          |
| <i>cdh2</i>    | GGGACAGGAACACTGCAAAT   | CGTTGATGGTCCAGTTTCT    | qRT-PCR                          |
| <i>cdh3</i>    | CCACAGACAGTGGAAACCTT   | GATGTTCACTGACTTGAGGCA  | qRT-PCR                          |
| <i>c-fos</i>   | GGGACAGCCTTTCTACTACCAT | GATCTGCGCAAAGTCTCTGTG  | qRT-PCR                          |
| <i>cldn23</i>  | CCAGCAGCTTTAATGGCTTT   | TTGGAAGACAAGCTCAACCT   | qRT-PCR                          |
| <i>cldn7</i>   | GAGCTGCAAATGTACGACT    | AACATGGCTAAGAAGCCCAA   | qRT-PCR                          |
| <i>c-myb</i>   | CTCCCTACTGAAGAAAGTGC   | AGATCACACCACGAAGAATC   | qRT-PCR                          |
| <i>crb3</i>    | CAACTCAACCCCAAGGTGAT   | AGGAGGACTCCCAGAATGGA   | qRT-PCR                          |
| <i>ctnna1</i>  | ACTTCAAATGGGACCCCAAA   | TTGGTGTTTACCAGGGTTGT   | qRT-PCR                          |
| <i>ctnnb1</i>  | GTGCAATTCTGAGCTGACA    | CTTAAAGATGGCCAGCAAGC   | qRT-PCR                          |
| <i>ctnnd1</i>  | CCAATCAATTACGGGCCTTC   | GTCCATGAAGGTAAGGGGAG   | qRT-PCR                          |
| <i>fn1</i>     | AGGCGGAAATCCAATGGTG    | CCAATGCGATACATGACCC    | qRT-PCR                          |
| <i>fra-1</i>   | AGAGCTGCAGAAGCAGAAGG   | CAAGTACGGGTCCTGGAGAA   | qRT-PCR                          |
| <i>fra-2</i>   | ATCCACGCTCACATCCCTAC   | GTTTCTCTCCCTCCGGATTC   | qRT-PCR                          |
| <i>gapdh</i>   | AACTTTGGCATTGTGGAAGG   | ACACATTGGGGGTAGGAACA   | qRT-PCR                          |
| <i>hprt</i>    | CTGGTGAAGGACCTCTCG     | CACAGGACTAGAACACCTGC   | qRT-PCR                          |
| <i>itga5</i>   | AGCCATTTAGCCTTCAGTGT   | GATGATGATCCACAACGGGA   | qRT-PCR                          |
| <i>itgb1</i>   | CAAGTGCCATGAGGGAAATG   | CTGTGCTACATTCACAGTGC   | qRT-PCR                          |
| <i>itgb2</i>   | GGTGCACTCATCAAGAATG    | TTGCCTACTCGATGCTCC     | qRT-PCR                          |
| <i>itgb5</i>   | AGTTTGCCAAGTCCAAAGTGAG | TTTCTGTACAGGGGTTTGAG   | qRT-PCR                          |
| <i>itgb6</i>   | AATGGCACTTCTGCCAAAGA   | GAAGGTATGTTTCAGGCAAG   | qRT-PCR                          |
| <i>jup</i>     | GTCCCTTTGCTTTTGTTTCG   | GGCTGCTCAATAAGGTTTCATC | qRT-PCR                          |
| <i>krt7</i>    | CTGGACATTGAGATCGCCAC   | GAGCATTGCTTCCCATGGTT   | qRT-PCR                          |
| <i>krt8</i>    | CTGGCTTACAGTACGGAATG   | TCAGAAGACTCGGACACCAG   | qRT-PCR                          |
| <i>mir200</i>  | TATCATCAGCTGTCTTCGG    | GACAGTGTGGATTTCTTGG    | qRT-PCR: mir200-429 polycistron  |
| <i>mir200c</i> | GGGTTGCTGCCAGATAAAAG   | ATACTGCCGGTAATGATGG    | qRT-PCR: mir200c-141 polycistron |
| <i>mir221</i>  | GCATGAACCTGGCATACAAT   | CTGAAACCCAGCAGACAATG   | qRT-PCR: mir 221-222 polycistron |
| <i>mmp10</i>   | TGGACACTTGACCCCTCAGG   | ATCTTCTTACGGTGGGAGG    | qRT-PCR                          |
| <i>mmp13</i>   | CAGTTGACAGGCTCCGAGAA   | CGTGTGCCAGAAGACCAGAA   | qRT-PCR                          |
| <i>mmp2</i>    | GGTTTCCCTAAGCTCATCGC   | GCTTCCAACTTACGCTCT     | qRT-PCR                          |
| <i>mmp3</i>    | GTTGTGTGCTCATCTACCC    | TCATCTCCAACCCGAGGAAC   | qRT-PCR                          |
| <i>ocln</i>    | GAATGGCAAGCGATCATACC   | CATCCACACTCAAGGTCAGA   | qRT-PCR                          |
| <i>rpl4</i>    | CTACTGCACTGGCAACCAAA   | TCTTGGCAACCACTTTTTC    | qRT-PCR                          |
| <i>rps29</i>   | ATGGGTCAACAGCAGCTCTA   | GCCTATGTCCTTCGCGTACT   | qRT-PCR                          |
| <i>s100a4</i>  | TGAGCAACTTGGACAGCAACA  | TTCCGGGGTTCCTTATCTGGG  | qRT-PCR                          |
| <i>snai1</i>   | CATGTCTGGACCTGGTTCCT   | AAGGGTCTTGAGGGAGGTA    | qRT-PCR                          |
| <i>snai2</i>   | AAAGCCTTTCTTTCGCCCTC   | AGCAGCCAGACTCCTCATGT   | qRT-PCR                          |
| <i>spp1</i>    | TGGCTGAATCTGAGGGACT    | CTATAGGATCTGGGTGCAGG   | qRT-PCR                          |
| <i>tascd1</i>  | CGATCCAGAACAACGATGGG   | GTGTCCTTGTGCGTTCTTCG   | qRT-PCR                          |
| <i>tascd2</i>  | AGATGAGAAGCGAACCTAGC   | AGAATTAACAGGCCAACCCA   | qRT-PCR                          |
| <i>tgfb1</i>   | GTCCTTGCCCTCTACAACCA   | GTTGGACAACCTGCTCCACT   | qRT-PCR                          |
| <i>tgfb2</i>   | CCCACATCTCTGCTAATGT    | CGAAGGCAGCAATTATCCTG   | qRT-PCR                          |
| <i>tgfb3</i>   | TCAGCCCAATGGAGACATAC   | GGGTTGTGGTGATCCTTTTG   | qRT-PCR                          |
| <i>tgfbr-1</i> | ACCGTGTGCCAATGAAGAG    | TTCTCCAAACCGACCTTTGC   | qRT-PCR                          |
| <i>tgfbr-2</i> | GGACCCTACTCTGTCTGTGG   | TGGAGTAGACATCCGTCTGC   | qRT-PCR                          |
| <i>trps1</i>   | AGAGAGCAAGACCAAGGATG   | ATTCTTTCGCCAGAGAGAGG   | qRT-PCR                          |
| <i>vim</i>     | GTGCGCCAGCAGTATGAAAG   | GCATCGTTGTTCCGGTTGG    | qRT-PCR                          |
| <i>zeb1</i>    | GCATCCAAAGAGCAAGAAGC   | ACTGGGCTGCTCAAGACTGT   | qRT-PCR                          |
| <i>zeb2</i>    | CTATTCCCCTGCATCAGCAT   | GGCTTGTCAGTCTTTTCTCG   | qRT-PCR                          |
| <i>Tgfb1-A</i> | GAGGCCACTAGAAACCTAAC   | CTTTGTGGTCTCTCACTCT    | ChIP qPCR: genomic               |
| <i>Tgfb1-B</i> | GCTGGTTGAGAGAAGAGGAA   | CAAGAAGTCCCCACGTCTC    | ChIP qPCR: genomic               |
| <i>Zeb1 -A</i> | CAAAGTGCGCAACTCGTCT    | GGACGCTGCAGAGTTTGAAT   | ChIP qPCR: genomic               |
| <i>Zeb1 -B</i> | AACAGATGACTTAACGGGGG   | CTGCAGCGATCAAGAATCTC   | ChIP qPCR: genomic               |
| <i>Zeb2</i>    | CGGCTGAGGACTTTTCTGAG   | CGAGGGGATCAGAGACAAGA   | ChIP qPCR: genomic               |
| <i>Oaz1</i>    | AGTCAGCGGGATCACAGTCT   | CTGGGAGCTCGATGTAGAGG   | ChIP qPCR: genomic               |

**Sup Table 3**
